# Supplementary material for: An ammonia-free chemical-bath-deposited ZnS(O,OH) buffer layer for flexible Cu(In,Ga)Se2 solar cell application: an eco-friendly approach to achieving improved stability
Source: Royal Society of Chemistry journal article supplement (doi:10.1039/c6gc01293k), 2016-01-01
Supplement: c6gc01293k1.pdf [file c6gc01293k1.pdf]

## Supplementary Information

### Ammonia-free chemical-bath-deposited ZnS(O,OH) buffer layer for flexible Cu(In,Ga)Se<sub>2</sub> solar cell application: an eco-friendly approach achieving improved stability

Tzu-Hsuan Yeh,<sup>a</sup> Chia-Hao Hsu,<sup>a</sup> Wei-Hao Ho,<sup>a</sup> Shih-Yuan Wei,<sup>a</sup> Chung-Hao Cai<sup>a</sup> and Chih-Huang Lai<sup>\*a</sup>

<sup>a</sup> Department of Materials Science and Engineering, National Tsing Hua University, Hsinchu 30013, Taiwan, Republic of China.

\* Corresponding author. E-mail: [chlai@mx.nthu.edu.tw](mailto:chlai@mx.nthu.edu.tw)

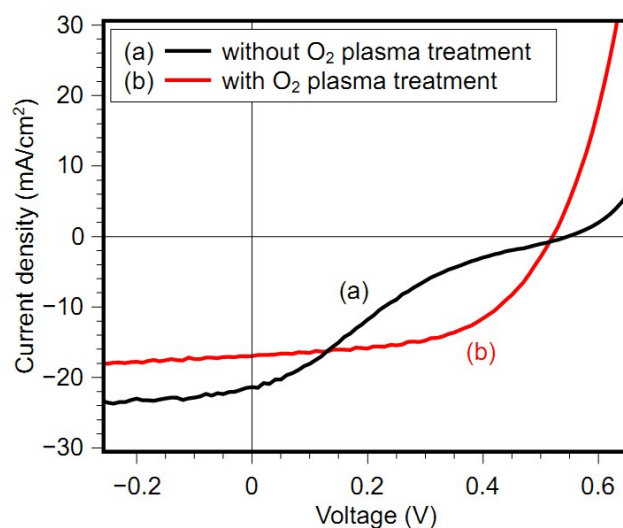

**Fig. S1** *J-V* characteristics of devices with 20nm-thick ammonia-free CBD-ZnS(O,OH) (a) without and (b) with oxygen plasma treatment. Without oxygen plasma treatment, the solar cell exhibited significant current-blocking behavior due to the high S/S+O ratio in the film. After oxygen plasma treatment, the CBO at the CIGS/ZnS(O,OH) interface was reduced so the current blocking behavior became less evident.

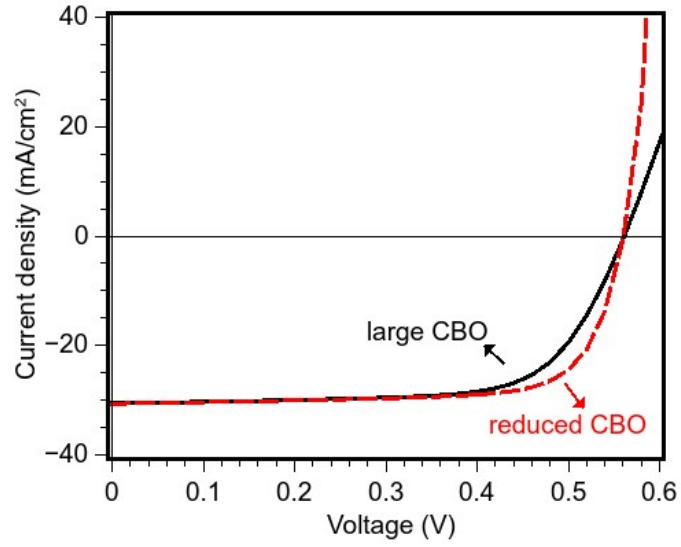

**Fig. S2** Simulated  $J$ - $V$  curves based on the band diagrams shown in Fig. 6c. Larger conduction band offset (CBO) at the CIGS/buffer interface results in a larger series resistance. A reduced CBO results in a smaller series resistance and improved  $FF$ , consistent to our experimental observation. The simulation was done by using SCAPS [1].

[1] M. Burgelman, P. Nollet and S. Degraeve, Thin Solid Films, 2000, 361–362, 527–532.
